# Supplementary material
Source: Research Square preprint supplement (doi:10.21203/rs.3.rs-8864462/v1)
Supplement: Supplementary file 1 [file 7fb7073cb033cb5cf67cefa4.docx]

**Supplementary Material for :**

**Preserved T-Cell Immunity Despite Impaired Humoral Responses following SARS-CoV-2 Infection and Vaccination in Children with Profound B-cell Lymphopenia**

**Authors :** Sabryna Nantel,1,2 Samuel Sassine,1,3 Benoîte Bourdin,1 Margot Barbosa Da Torre,4 Gabrielle Sutton,1 Henintsoa Rabezanahary,5 Freda Qi,6 Lesley A. Ward,7 Melanie Delgado-Brand,6 Kelsey Adams,1 Salma Sheikh-Mohamed,7 Louise Wang,1 Sylvie Nicholson,1 Zineb Laghdir,1 Karen Colwill,6 Gary Chao,7 Laurie Seifried,6,7 Ying Liu,8 James M. Rini,8 Jennifer Gommerman,7 Anne-Claude Gingras,6,8 Mariana Baz,5 Kate Zinzser,4,9 Caroline Quach 1,2,3 & Hélène Decaluwe 1,2,10*

**Affiliations**

1 Sainte-Justine University Hospital and Research Center, Montreal, Quebec, Canada.

2 Department of Microbiology, Infectious Diseases and Immunology, Faculty of Medicine, University of Montreal, Montreal, Quebec, Canada.

3 Division of General Pediatrics, Department of Pediatrics, University of Montreal, Montreal, Quebec, Canada.

4 Center for Public Health Research, University of Montreal, Montreal, Quebec, Canada.

5 Microbiology, Infectiology and Immunology Department, Université Laval, Quebec City, Quebec, Canada.

6 Lunenfeld-Tunenbaum Research Institute at Mount Sinai Hospital, Sinai Health, Toronto, Ontario, Canada.

7 Department of Immunology, University of Toronto, Toronto, Ontario, Canada.

8 Department of Molecular Genetics, University of Toronto, Toronto, Ontario, Canada.

9 Department of Social and Preventive Medicine, School of Public Health, University of Montreal, Quebec, Canada.

10 Division of Pediatric Immunology and Rheumatology Division, Department of Pediatrics, University of Montreal, Montreal, Quebec, Canada.

**CORRESPONDING AUTHOR (*)**

Hélène Decaluwe

CHU Sainte-Justine Research Center

3175, Chemin de la Côte-Sainte-Catherine, Montréal, QC, Canada (H3T 1C5)

helene.decaluwe@umontreal.ca

**SUPPLEMENTAL FIGURES AND LEGENDS**

**Supplemental Tables**

**Table S1.** Clinical characteristics and diagnosis of children with humoral immunodeficiency

**Table S2.** Immunological data prior to vaccination in children with humoral immunodeficiency based on the number of vaccine doses received

**Table S3.** Immunological data prior to vaccination in children with humoral immunodeficiency based on absolute B cell numbers

**Table S4.** Antibodies used for spectral flow cytometry panels

**Table S5.** Detection range and positivity threshold for ELISA on serum and saliva

**Supplemental Figures**

**Figure S1.** Serum and salivary IgA responses are impaired are impaired in immunocompromised children who received a two-dose COVID-19 primary vaccine series.

**Figure S2.** SARS-CoV-2 infection does not correct mucosal or systemic IgA defects following two-dose vaccination in immunocompromised children.

**Figure S3.** A three-dose primary series enhances humoral responses in immunocompromised children, whereas T-cell responses are comparable across groups.

**Figure S4.** Circulating plasmablasts and follicular helper T cells do not correlate with reduced neutralizing antibody titers in children with humoral immunodeficiency.

**Figure S5.** Severe B-cell lymphopenia reduces mucosal and systemic humoral responses up to one year after vaccination.

**Table S1. Clinical characteristics and diagnosis of children with humoral immunodeficiency**

|  | **Number (%)  of patients** |
| --- | --- |
| **Primary humoral immunodeficiency (PID)** | **15** |
| **Type of humoral immunodeficiency** |  |
| Combined immunodeficiencies based on IUIS classification * | 5 (33) |
| Predominant antibody immunodeficiency based on IUIS classification ** | 6 (40) |
| Unclassified humoral immunodeficiency *** | 4 (27) |
| **Presence of an identified genetic mutation explaining patient’s phenotype** | 7 (47) |
| **Immunological characteristics of patients prior to inclusion** |  |
| T cell lymphopenia | 5 (33) |
| B cell lymphopenia | 5 (33) |
| Reduced memory B-cell (CD27+) (< 8% of CD19+) | 9 (60) |
| % of CD27+/CD19+ cells, median [IQR], % | 6.0 [3.0-8.0] |
| Hypogammaglobulinemia | 8 (62) |
| Reduced IgM levels | 7 (47) |
| Dissociated vaccine responses | 10 (67) |
| **Time between diagnosis and COVID-19 vaccination, median [IQR], years** | 4.5 [0.8-5.6] |
| **Treatment with immunoglobulin supplementation at inclusion (SC or IV)** | 13 (87) |
|  |  |
| **Secondary humoral immunodeficiency (SID)** | **12** |
| **Rituximab treatment†** | 10 |
| Monotherapy | 4 (40) |
| In combination with other immunosuppressive treatment ‡ | 6 (60) |
| Number of rituximab cycles prior to vaccination, median [IQR] | 2 [2-4] |
| Time between last rituximab treatment and COVID-19 vaccination, median [IQR], days | 67 [55-108] |
| **CAR-T cell therapy or hematopoietic stem cell transplantation (HSCT)§** | 2 |
| **Immunological characteristics of patients prior to inclusion** |  |
| T cell lymphopenia | 2 (17) |
| B cell lymphopenia | 12 (100) |
| Hypogammaglobulinemia | 9 (75) |
| Reduced IgM levels | 8 (67) |
| **Treatment with immunoglobulin supplementation at inclusion (SC or IV)** | 6 (50) |
|  |  |
| *Genetic mutation identified : STAT3, LIG4, ADA2.  **Genetic mutation identified : BTK, TACI.  ***Genetic mutation identified : NFKB1. |  |
| †Patient diagnosis : Juvenile systemic arthritis (Still’s disease), nephrotic syndrome, IgA vasculitis, rapid-onset obesity with hypoventilation, hypothalamic dysfunction, autonomic dysregulation (ROHHAD) syndrome, autoimmune hepatitis, post-transplant lymphoproliferative disease, anti-HLA immunization desensitization protocol for future heart transplant  §Patient diagnosis : Refractory acute B-cell lymphoblastic leukemia, acute myeloblastic leukemia  ‡IS therapies received in addition to rituximab: tacrolimus, methotrexate, tofacitinib, sirolimus |  |

**Table S2. Immunological data prior to vaccination in children with humoral immnodeficiency based on the number of vaccine doses received**

|  | **2 doses (n = 10)** | **3 doses (n = 17)** | **P-value** |
| --- | --- | --- | --- |
| **Time between immunophenotyping and vaccination, median [IQR], days** | 40 [7-92] | 182 [88-744] | 0.14 |
|  | | | |
| **Absolute lymphocyte count, median [IQR], x106/L** | 1850 [1600-2200] | 2300 [1600-3700] | 0.20 |
|  | | | |
| **T cell count** | | | |
| Absolute CD3+ lymphocyte count; median [IQR], x106/L | 1570 [1328-1775] | 1752 [1463-2911] | 0.18 |
| Number (%) of patients with CD3+ lymphopenia† | 1 (10) | 1 (6) | 0.71 |
|  | | | |
| Absolute CD4+ lymphocyte count; median [IQR], x106/L | 914 [496-1012] | 1053 [836-1599] | 0.17 |
| Number (%) of patients with CD4+ lymphopenia† | 1 (10) | 1 (6) | 0.44 |
|  |  | | |
| Absolute CD8+ lymphocyte count; median [IQR], x106/L | 579 [400-641] | 553 [448-962] | 0.24 |
| Number (%) of patients with CD8+ lymphopenia† | 1 (10) | 2 (12) | 0.83 |
|  |  |  |  |
| **B cell count** |  |  |  |
| Absolute CD19+ lymphocyte count; median [IQR], x106/L | 118 [0-528] | 268 [24-390] | 0.81 |
| Number (%) of patients with B-cell lymphopenia† | 7 (70) | 8 (47) | 0.23 |
|  |  |  |  |
| Number (%) of patients with detectable CD19+ CD27+ B cells | 3 (30%) | 13 (76%) | 0.04 |
| Pourcentage of CD19+CD27+ B cells**‡**; median [IQR], % | 5 [3-12] | 13 [5-18] | 0.32 |
| Number (%) of patients with reduced switched memory B cells (<8%)‡ | 2 (67%) | 6 (46%) | 1 |
|  |  |  |  |
| **Immunoglobulin levels** |  |  |  |
| IgG levels, median [IQR], g/L | 7.4 [5.9-11.2] | 10.3 [8.7-11.6] | 0.18 |
| IgM levels, median [IQR], g/L | 0.4 [0.1-0.6] | 0.5 [0.1-0.7] | 0.58 |
| IgA levels, median [IQR], g/L | 1.3 [0.3-2.6] | 0.7 [0.3-1.0] | 0.21 |
| †Count according to age | | | |
| ‡In individuals where CD19+ CD27+ B cells were detected or performed | | | |
| IQR : Inter Quartile Range; n= number of patients | | | |

**Table S3. Immunological data prior to vaccination in children with humoral immunodeficiency based on the absolute B cell count**

|  | **Severe B-cell lymphopenia*** | **B-cell sufficient** |  |
| --- | --- | --- | --- |
| **(n = 15)** | **(n = 12)** |
| **Time between immunophenotyping and vaccination, median [IQR], days** | 60 [32-127] | 416 [148-905] | 0.13 |
|  | | | |
| **Absolute lymphocyte count, median [IQR], x106/L** | 1600 [1300-2200] | 2450 [2100-3100] | 0.51 |
|  | | | |
| **T cell count** | | | |
| Absolute CD3+ lymphocyte count; median [IQR], x106/L | 1490 [1190-1936] | 1792 [1602-2248] | 0.96 |
| Number (%) of patients with CD3+ lymphopenia† | 2 (13) | 0 (0) | 0.39 |
|  | | | |
| Absolute CD4+ lymphocyte count; median [IQR], x106/L | 928 [496-1030] | 1059 [954-1397] | 0.90 |
| Number (%) of patients with CD4+ lymphopenia† | 2 (13) | 0 (0) | 0.43 |
|  | | | |
| Absolute CD8+ lymphocyte count; median [IQR], x106/L | 486 [400-770] | 554 [479-762] | 0.94 |
| Number (%) of patients with CD8+ lymphopenia† | 3 (20) | 0 (0) | 0.12 |
|  |  | | |
| **B cell count** |  |  |  |
| Absolute CD19+ lymphocyte count; median [IQR], x106/L | 18 [0-98] | 466 [362-572] |
| Number (%) of patients with B-cell lymphopenia | 15 (100) | 0 (0.0) | <0.001 |
|  |  |  |  |
| Number (%) of patients with detectable CD19+ CD27+ B cells | 5 (33%) | 11 (92%) | 0.003 |
| Pourcentage of CD19+CD27+ B cells**‡**; median [IQR], % | 5 [5-13] | 12 [3-18] | 0.39 |
| Number (%) of patients with reduced switched memory B cells (<8%)‡ | 60% | 46% | 0.60 |
|  |  |  |  |
| **Immunoglobulin levels** |  |  |  |
| IgG levels, median [IQR], g/L | 9.3 [6.3-11.6] | 10.0 [6.0-12.3] | 0.92 |
| IgM levels, median [IQR], g/L | 0.1 [0.1-0.5] | 0.6 [0.5-0.8] | 0.005 |
| IgA levels, median [IQR], g/L | 1.1 [0.1-2.6] | 0.7 [0.6-0.9] | 0.77 |
|  | | | |
| * < 5th percentile for age  **†**Count according to age | | | |
| ‡In individuals where CD19+ CD27+ B cells were detected or performed | | | |
| IQR : InterQuartile Range; n= number of patients | |  |  |

**Table S4. Antibodies used for spectral flow cytometry panels**

| **Antibodies** | **Company** | **Clone** | **Catalog number** |
| --- | --- | --- | --- |
| **AIM and cTFH panel** |  |  |  |
| PE-CF594 Mouse Anti-Human CD279 (PD-1) | BD | EH12.1 | 565024 |
| BV711 Rat Anti-Human CXCR5 (CD185) | BD | RF8B2 | 740737 |
| Alexa Fluor 488 Mouse Anti-Human CD107a | BD | H4A3 | 567006 |
| Brilliant Violet 785 Anti-Human CD25 | BioLegend | BC96 | 302638 |
| PE/Cyanine Anti-Human CD134 (OX40) | BioLegend | Ber-ACT35 | 350012 |
| APC Anti-human CD137 (4-1BB) | BioLegend | B4-1 | 309810 |
| BUV737 Mouse Anti-Human CCR7 (CD197) | BD | 2-L1-A | 749676 |
| eFluor 450 Anti-Human CD45RA | eBioscience | HI100 | 480458842 |
| Alexa Fluor 700 Mouse Anti-Human CD8 | BD | RPA-T8 | 557945 |
| V500 Mouse Anti-Human CD4 | BD | RPA-T4 | 560768 |
| BUV395 Mouse Anti-Human CD3 | BD | SK7 | 564001 |
| PE Mouse Anti-Human CD69 | BD | FN50 | 555531 |
| BV605 Viability Staining Solution | Invitrogen | - | 501128859 |
| **SARS-CoV-2 Spike-Specific B cell panel** | | |  |
| Streptavidin PE | Miltenyi Biotec | - | 130-128-022 |
| Streptavidin PE-Vio 770 | Miltenyi Biotec | - | 130-128-022 |
| BUV395 Anti-Human IgD | BD | IA6-2 | 563813 |
| APC Anti-Human IgM | Miltenyi Biotec | PJ2-22H3 | 130-128-022 |
| VioBlue Anti-Human IgG | Miltenyi Biotec | IS11-3B2.2.3 | 130-128-022 |
| VioGreen Anti-Human IgA | Miltenyi Biotec | IS11-8E10 | 130-128-022 |
| Vio Bright FITC Anti-Human CD27 | Miltenyi Biotec | M-T271 | 130-128-022 |
| Brilliant Violet 605 Anti-Human CD38 | BioLegend | HIT2 | 303532 |
| BV711 Mouse Anti-Human CD20 | BD | L27 | 740644 |
| APC-Vio 770 Anti-Human CD19 | Miltenyi Biotec | LT19 | 130-128-022 |
| BUV737 Mouse Anti-Human CD3 | BD | UCHT1 | 612750 |
| 7-AAD Viability Staining Solution | Miltenyi Biotec | - | 130-128-022 |

**Table S5. Detection range and positivity threshold for ELISA on serum and saliva**

| **Antibodies** | **Antigen** | **Detection range** | **Positivity threshold** |
| --- | --- | --- | --- |
| **ELISA on serum** |  |  |  |
|  |  |  |  |
| IgG | Spike | 1.13 - 24 013 BAU/mL | 11.28 BAU/mL |
|  | RBD | 3.02 - 71 264 BAU/mL | 30.97 BAU/mL |
|  | Nucleocapsid | 2.59 - 5 344 BAU/mL | 10.01 BAU/mL |
|  |  |  |  |
| IgA |  |  |  |
|  | Spike | 18.18 - 17 750 BAU/mL | 71.39 BAU/mL |
|  | RBD | 28.21 - 23 481 BAU/mL | 139.54 BAU/mL |
|  | Nucleocapsid | 99.09 - 214 834 BAU/mL | 779.09 BAU/mL |
|  |  |  |  |
| **ELISA on saliva** |  |  |  |
|  |  |  |  |
| IgG |  |  |  |
|  | Spike | 0 - 40.07 Adjusted AUC | 0.39 Adjusted AUC |
|  | RBD | 0 - 27.61 Adjusted AUC | 0.07 Adjusted AUC |
|  |  |  |  |
| IgA |  |  |  |
|  | Spike | 0 - 13.53 Adjusted AUC | 0.18 Adjusted AUC |
|  | RBD | 0 - 43.23 Adjusted AUC | 0 Adjusted AUC |
|  |  |  |  |

**Figure S1.** **Serum and salivary IgA responses are impaired are impaired in immunocompromised children who received a two-dose COVID-19 primary vaccine series**





Humoral immunity was assessed one month after the last vaccine dose in children who had no history of SARS-CoV-2 infection. Samples were analyzed for healthy children who received two doses of COVID-19 vaccine (HC, 2 doses, N = 19 to 25, black), for immunocompromised children who received two doses of COVID-19 vaccine (IC, 2 doses, N = 5 to 10, light blue) and immunocompromised children who received three doses of COVID-19 vaccine (IC, 3 doses, N = 4 to 5, dark blue). **(A)** Saliva anti-spike IgA (left panel) and anti-RBD IgA (right panel) measured by ELISA. **(B)** Serum anti-spike IgA (left panel) and anti-RBD IgA (right panel) measured by ELISA. **(A-B)** Dashed black lines indicates the positive threshold value when applicable. The percentage of samples above this positive threshold value is indicated for each group. Boxes indicate mean ± SEM. Statistical significance was established as not significant (ns) P >.05, *P <.05, **P <.01.

**Figure S2.** **SARS-CoV-2 infection does not correct mucosal or systemic IgA defects following two-dose vaccination in immunocompromised children**

**

**

Humoral immunity was assessed one month after the last vaccine dose in children who were infected by SARS-CoV-2. Samples were analyzed for healthy children who received two doses of COVID-19 vaccine (HC, 2 doses, N = 20, black), for immunocompromised children who received two doses of COVID-19 vaccine (IC, 2 doses, N = 11 to 13, light blue) and immunocompromised children who received three doses of COVID-19 vaccine (IC, 3 doses, N = 8 to 11, dark blue). **(A)** Saliva anti-spike IgA (left panel) and anti-RBD IgA (right panel) measured by ELISA. **(B)** Serum anti-spike IgA (left panel) and anti-RBD IgA (right panel) measured by ELISA. **(A-B)** Dashed black lines indicates the positive threshold value when applicable. Boxes indicate mean ± SEM. The percentage of samples above this positive threshold value is indicated for each group. Statistical significance was established as not significant (ns) P >.05, *P <.05, ***P <.001.

**Figure S3.** **A three-dose primary series enhances humoral responses in immunocompromised children, whereas T-cell responses are comparable across groups**


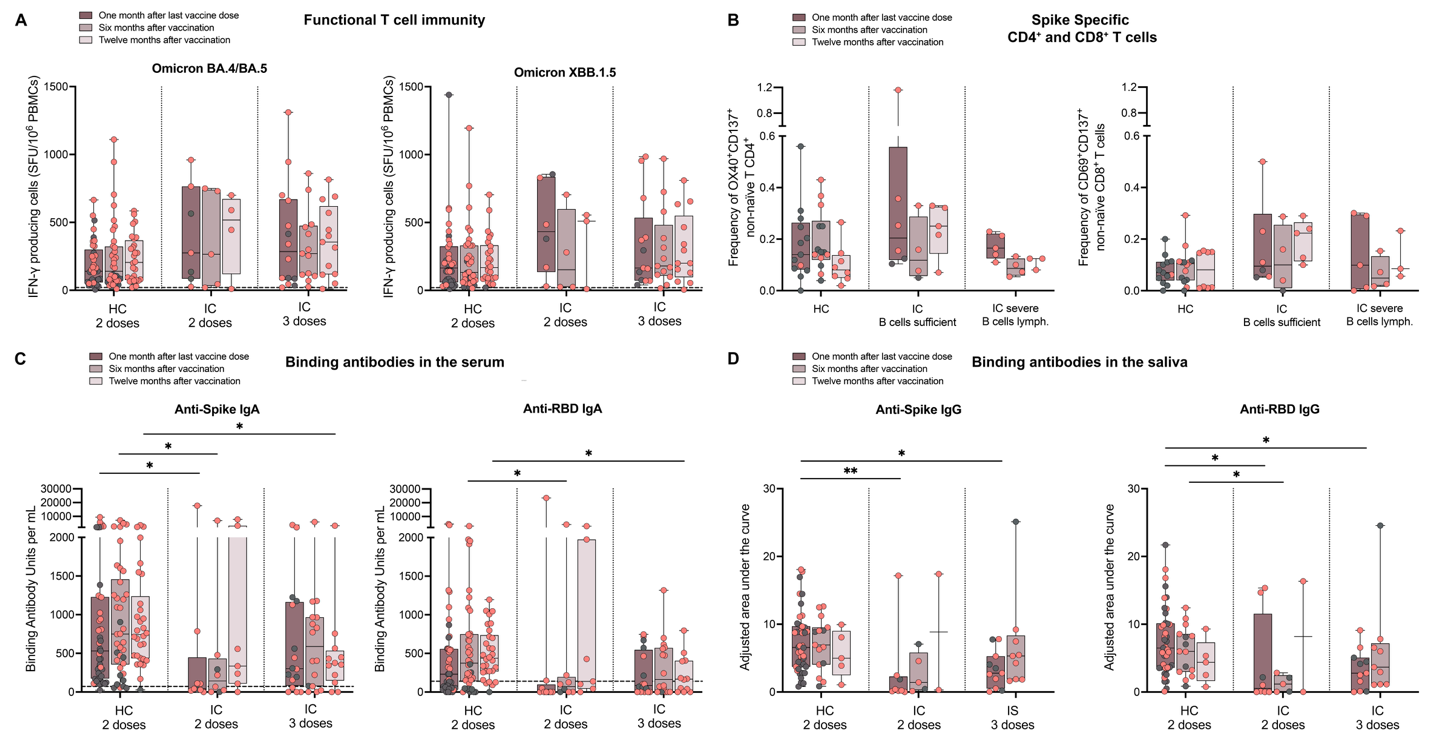


Cellular and humoral immunity were assessed at one, six and twelve months after the last vaccine dose in children who had no history of SARS-CoV-2 infection (black dots) and in children who were infected by SARS-CoV-2 (red dots). Available samples were analyzed for healthy children who received two doses of COVID-19 vaccine (HC, 2 doses, N = 38), for immunocompromised children who received two doses of COVID-19 vaccine (IC, 2 doses, N = 7) and immunocompromised children who received three doses of COVID-19 vaccine (IC, 3 doses, N = 15). **(A)** Functional T-cell responses assessed by ELISpot following stimulation of PBMCs with SARS-CoV-2 spike peptides from Omicron BA.4/BA.5 strain (left panel) and XBB.1.5 strain (right panel), expressed as IFN-γ producing cells per 10⁶ PBMCs. **(B)** Frequency of activated SARS-CoV-2 spike–specific CD4⁺ (left panel) and CD8⁺ T (right panel) cells among non-naïve T cells following ancestral spike peptide stimulation. **(C)** Serum anti-spike IgA (left panel) and anti-RBD IgA (right panel) measured by ELISA. **(D)** Saliva anti-spike IgG (left panel) and anti-RBD IgG (right panel) measured by ELISA. **(A-D)** Dashed black lines indicates the positive threshold value when applicable. Boxes indicate mean ± SEM. Statistical significance was established as not significant (ns, not shown) P >.05, *P <.05, **P <.01, ***P <.001, ****P <.0001.

**Figure S4.** **Circulating plasmablasts and follicular helper T cells do not correlate with reduced neutralizing antibody titers in children with humoral immunodeficiency**


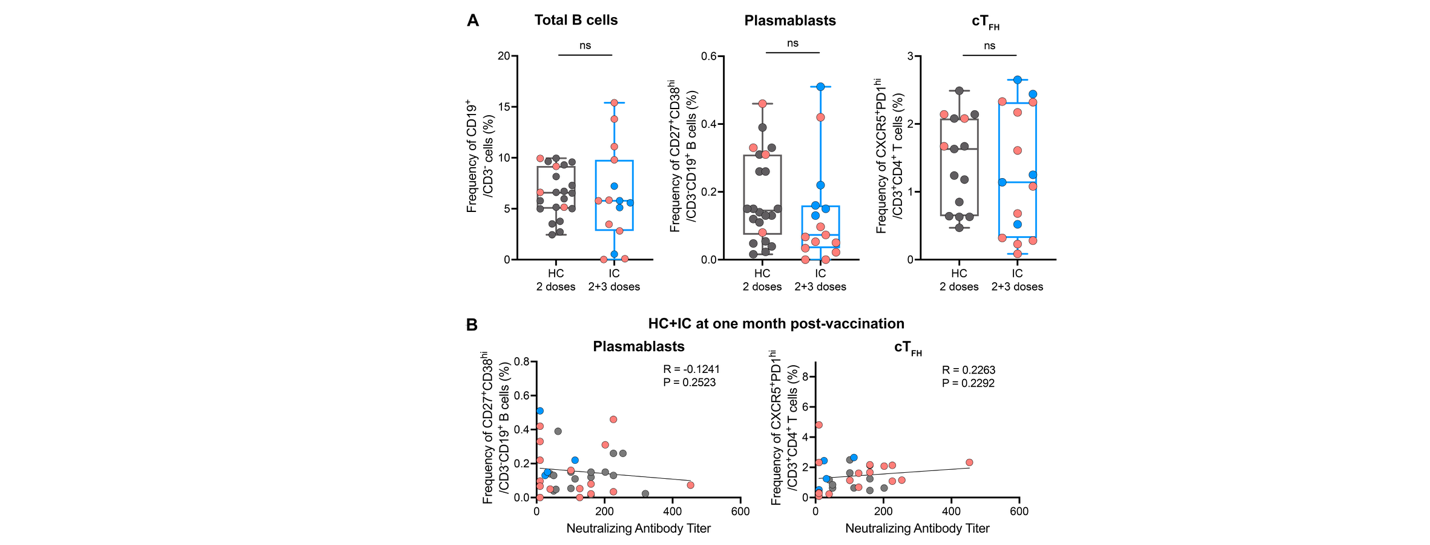


Spectral flow cytometry was performed to assess the determinants linked to the absence of neutralizing antibodies in children with humoral immune deficiency. Non-specific T and B cells phenotyping as well as SARS-CoV-2 specific staining were done at the closest available time point to vaccination in children without a history of SARS-CoV-2 infection (black or blue dots respectively) and in children with prior infection (red dots). Available samples were analyzed for healthy children who received two doses of COVID-19 vaccine (HC, 2 doses, N = 18, black, vaccinated only and N = 4, red, hybrid immune) and for immunocompromised children who received 2 or 3 doses of COVID-19 vaccine (IC, 2 or 3 doses, N = 5, light blue, vaccinated only and N = 9, red, hybrid immune). **(A)** Frequencies of total B cells (left panel), plasmablasts (middle panel) and cTFH (right panel) are shown for HC and IC groups.Boxes indicate mean ± SEM. **(B)** Correlations between neutralizing antibody titers and plasmablasts (left panel) and cTFH (right panel) at one month post-vaccination in the combined HC and IC cohort.Boxes indicate mean ± SEM. Statistical significance was established as not significant (ns) P >.05, *P <.05, **P <.01, ***P <.001. Correlation was assessed by Spearman correlation coefficient. Coefficient R and P-values are shown.

**Figure S5.** **Severe B-cell lymphopenia reduces mucosal and systemic humoral responses up to one year after vaccination**


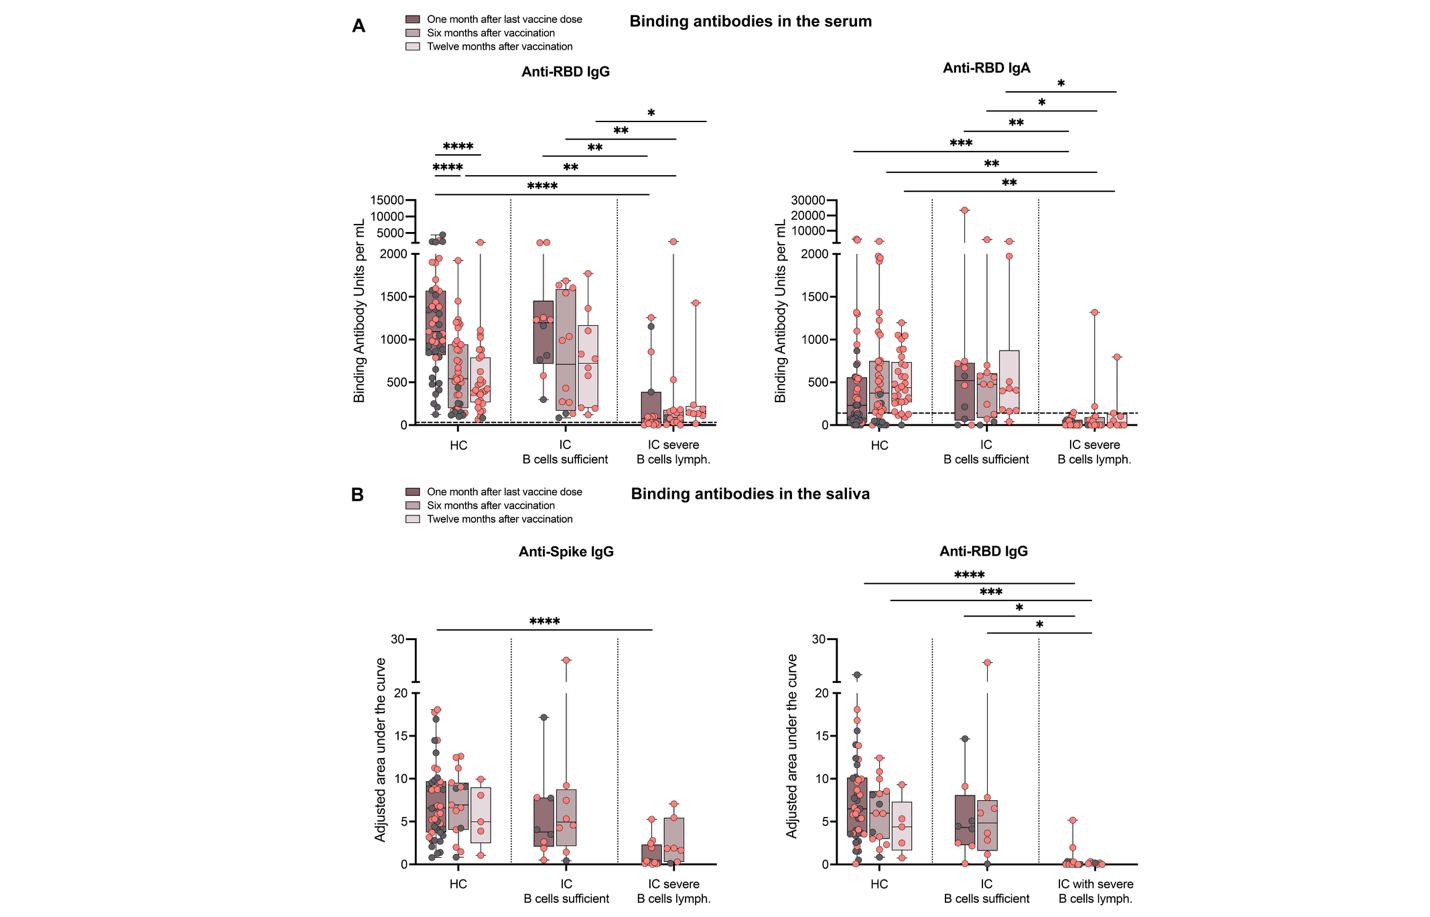
Humoral immunity was assessed at one, six and twelve months after the last vaccine dose in children who had no history of SARS-CoV-2 infection (black dots) and in children who were infected by SARS-CoV-2 (red dots). Available samples were analyzed for healthy children who received two doses of COVID-19 vaccine (HC, 2 doses, N = 38), for immunocompromised children with B cell levels over the 5th percentile for their age (IC, B cells sufficient, N = 10) and immunocompromised children with B cell levels under the 5th percentile for their age (IC, severe B cells lymphopenia, N = 15). **(A)** Serum anti-RBD IgG (left panel) and anti-RBD IgA (right panel) measured by ELISA.(**B**). Saliva anti-spike IgG (left panel) and anti-RBD IgG (right panel) measured by ELISA. **(A-B)** Boxes indicate mean ± SEM. Statistical significance was established as not significant (ns, not shown) P >.05, *P <.05, **P <.01, ***P <.001, ****P <.0001.
